# Supplementary material
Source: PubMed Central journal article supplement (PMC4001555)
Supplement: JCI73639sd.pdf [file JCI73639sd.pdf]

# Supplementary Figure 1

A

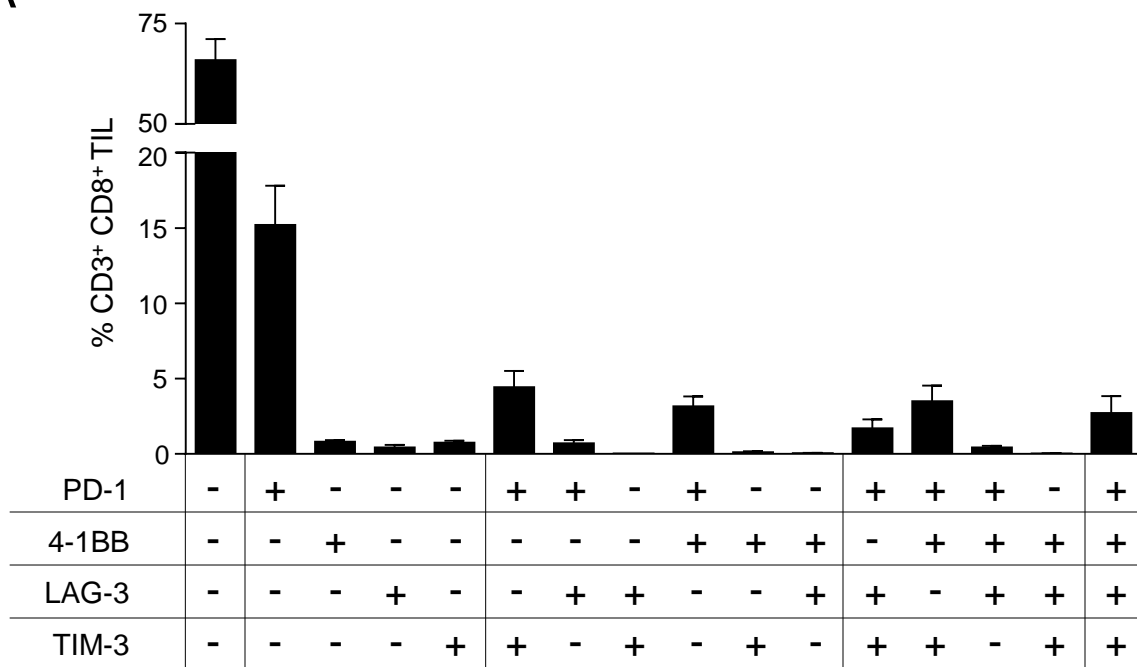

**Supplementary Figure 1. Boolean gate analysis to study co-expression pattern of PD-1, LAG-3, TIM-3 and 4-1BB in CD8<sup>+</sup> TIL.** All possible permutations of expression of PD-1, LAG-3, TIM-3 and 4-1BB on CD8<sup>+</sup> TIL were analyzed with boolean gate analysis. Expression of individual or combination of markers is shown as the mean $\pm$ s.e.m.

## Supplementary Figure 2

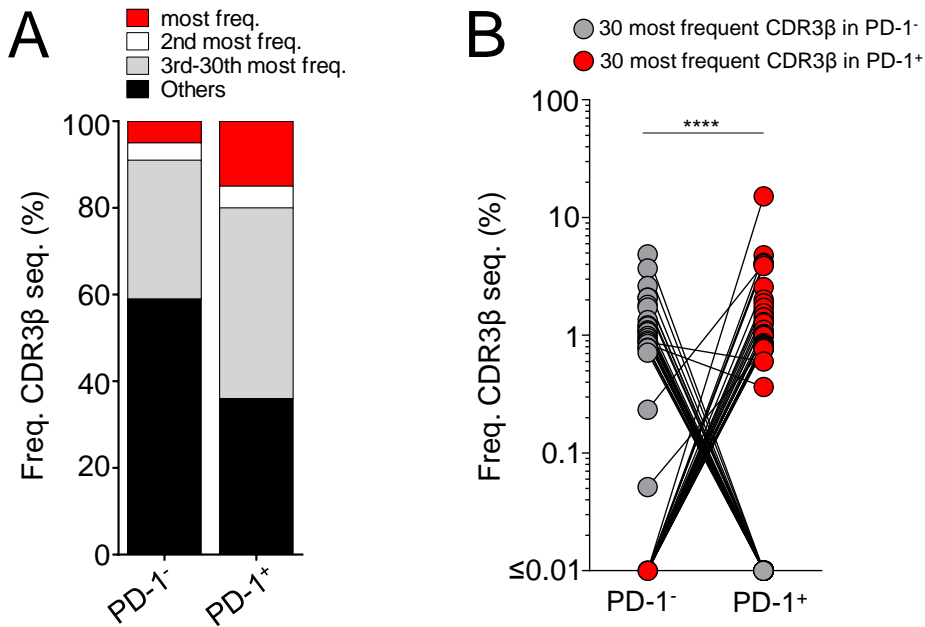

**Supplementary Figure 2. TCRβ deep sequencing of CD8<sup>+</sup> TIL from FrTu3612.** CD8<sup>+</sup>PD-1<sup>+</sup> and PD-1<sup>-</sup> TIL were sorted to high purity from fresh melanoma digest FrTu3612, mRNA was extracted, and TCRβ deep sequencing was performed. **(A)** Diversity of the TCRβ repertoire within the CD8<sup>+</sup>PD-1<sup>-</sup> and PD-1<sup>+</sup> populations. The relative frequencies of the most frequent TCRβ clonotype (unique CDR3β amino acid sequences), the second most frequent, the 3<sup>rd</sup> to 30<sup>th</sup> most frequent, and the rest of the clonotypes are shown. **(B)** Frequency of the thirty most frequent CD8<sup>+</sup>PD-1<sup>+</sup> and PD-1<sup>-</sup> TCRβ clonotypes. The frequencies of the most represented clonotypes and their frequencies in the PD-1<sup>+</sup> and PD-1<sup>-</sup> populations are shown. Each dot represents one unique TCRβ clonotype. \*\*\*\* $P \leq 0.0001$ , significant by Wilcoxon signed-rank test.

## Supplementary Figure 3

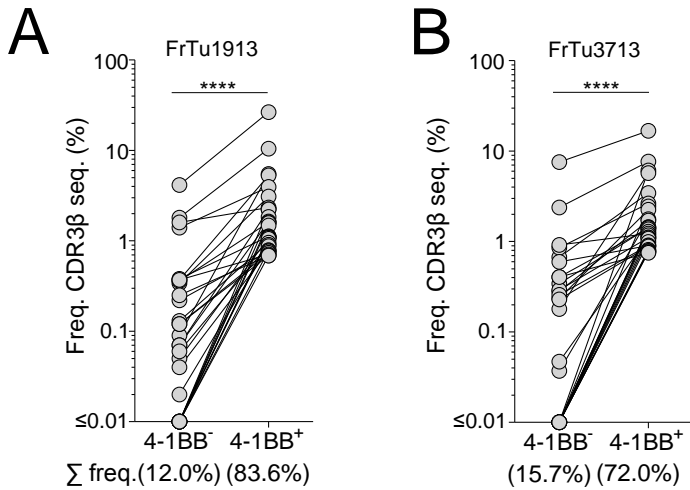

**Supplementary Figure 3. TCR $\beta$  deep sequencing of CD8 $^+$  TIL separated based on expression of 4-1BB in the tumor.** Frequency of the thirty most frequent TCR $\beta$  clonotypes in the CD8 $^+$ 4-1BB $^+$  population of (A) FrTu1913, and (B) FrTu3713. The frequencies in the 4-1BB $^+$  and 4-1BB $^-$  populations are shown. The cumulative frequency ( $\Sigma$  freq.) of the clonotypes present in each of the populations is shown below. \*\*\*\*  $P \leq 0.0001$ , significant by Wilcoxon signed-rank test.

## Supplementary Figure 4

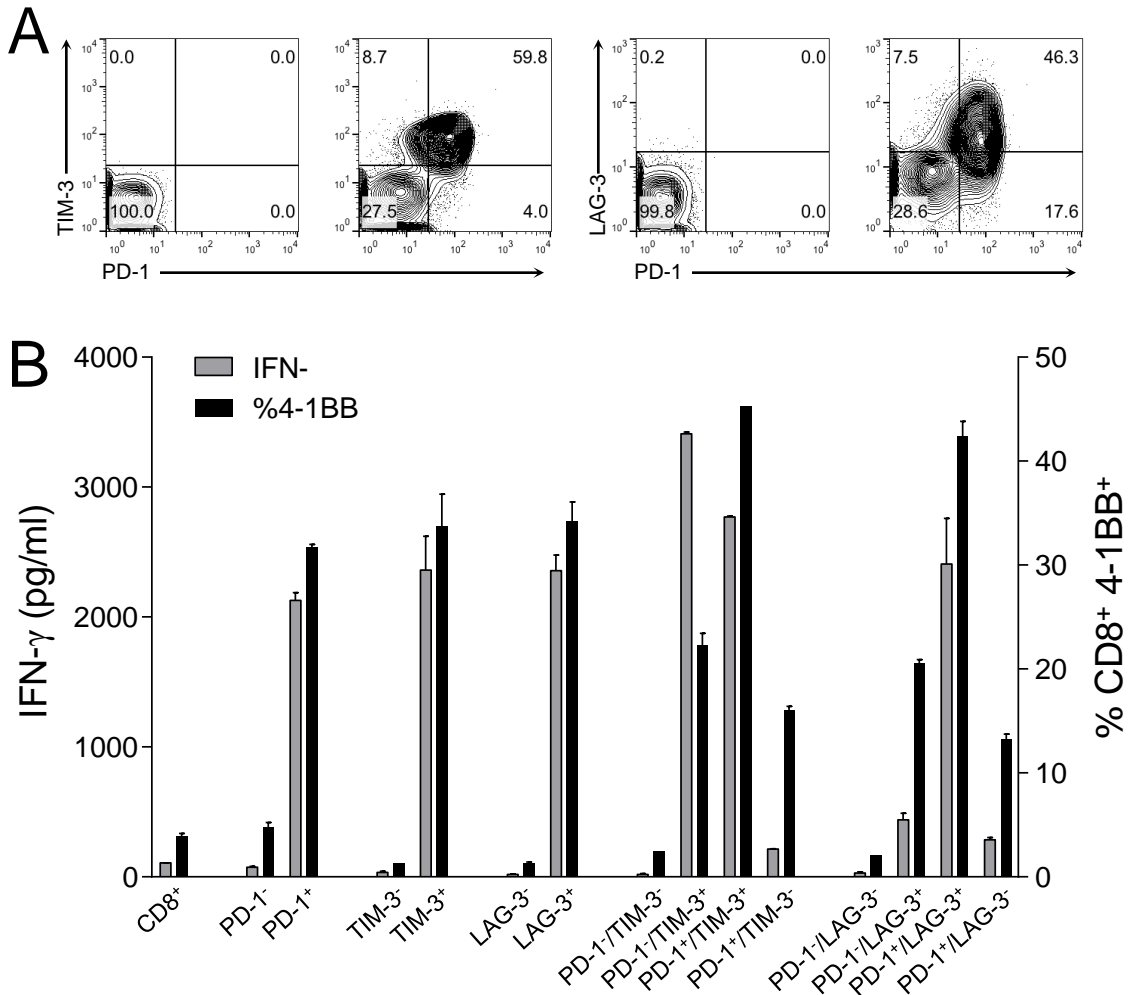

**Supplementary Figure 4. Response of CD8<sup>+</sup> TIL subpopulations derived from FrTu3289 to autologous tumor cell line TC3289.** CD8<sup>+</sup> TIL were sorted from FrTu3289 into CD8<sup>+</sup>, PD-1<sup>-</sup>, PD-1<sup>+</sup>, TIM-3<sup>-</sup>, TIM-3<sup>+</sup>, LAG-3<sup>-</sup>, LAG-3<sup>+</sup>, PD-1<sup>-</sup>/TIM-3<sup>-</sup>, PD-1<sup>-</sup>/TIM-3<sup>+</sup>, PD-1<sup>+</sup>/TIM-3<sup>-</sup>, PD-1<sup>+</sup>/TIM-3<sup>+</sup>, PD-1<sup>-</sup>/LAG-3<sup>-</sup>, PD-1<sup>-</sup>/LAG-3<sup>+</sup>, PD-1<sup>+</sup>/LAG-3<sup>-</sup>, and PD-1<sup>+</sup>/LAG-3<sup>+</sup> and expanded in vitro for 15 days with OKT3, IL-2 and irradiated feeders. **(A)** Phenotype of CD8<sup>+</sup> TIL in FrTu3289. FrTu3289 was thawed and rested overnight in absence of cytokines. Dot plots show the background staining (isotype control) and expression of TIM-3 by PD-1 or LAG-3 by PD-1. **(B)** Response of CD8<sup>+</sup> TIL subpopulations expanded from FrTu3289 to autologous tumor cell line TC3289. The mean IFN- $\gamma$  release and 4-1BB upregulation (mean $\pm$ s.d., duplicates) 24h after coculture is plotted.

# Supplementary Figure 5

A

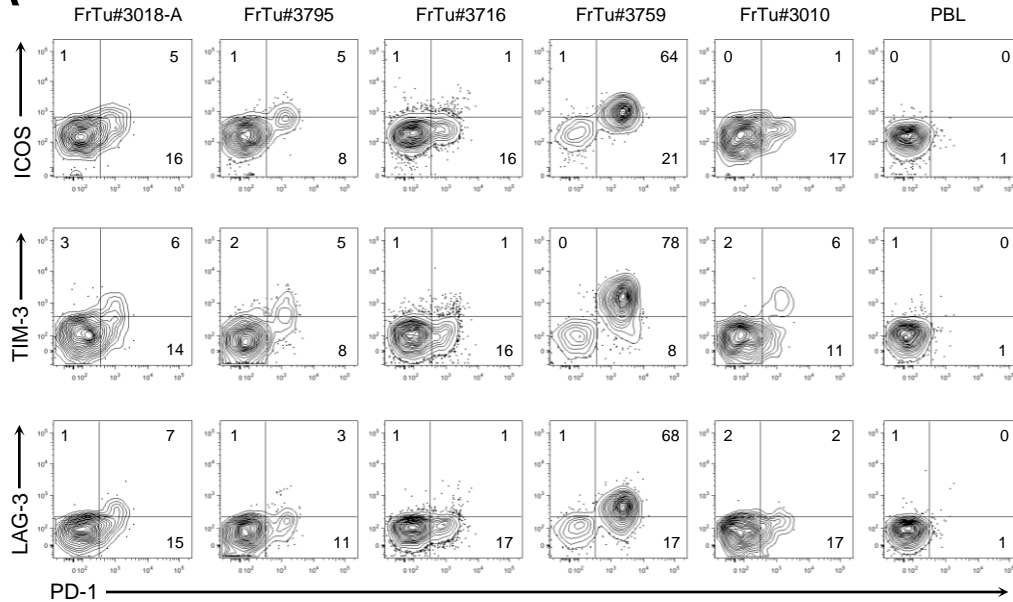

**Supplementary Figure 5. PD-1 expression on CD8<sup>+</sup> melanoma TIL is associated with ICOS, TIM-3 and LAG-3 expression. (A)** Phenotypic characterization of tumor-infiltrating CD8<sup>+</sup> lymphocytes. Dot plots depict the frequency of expression of PD-1, ICOS, TIM-3 and LAG-3 on tumor-infiltrating and peripheral blood CD8<sup>+</sup> lymphocytes (TIL n=5; PBL n=1), and the pattern of co-expression of ICOS, TIM-3 or LAG-3 with PD-1.

# Supplementary Figure 6

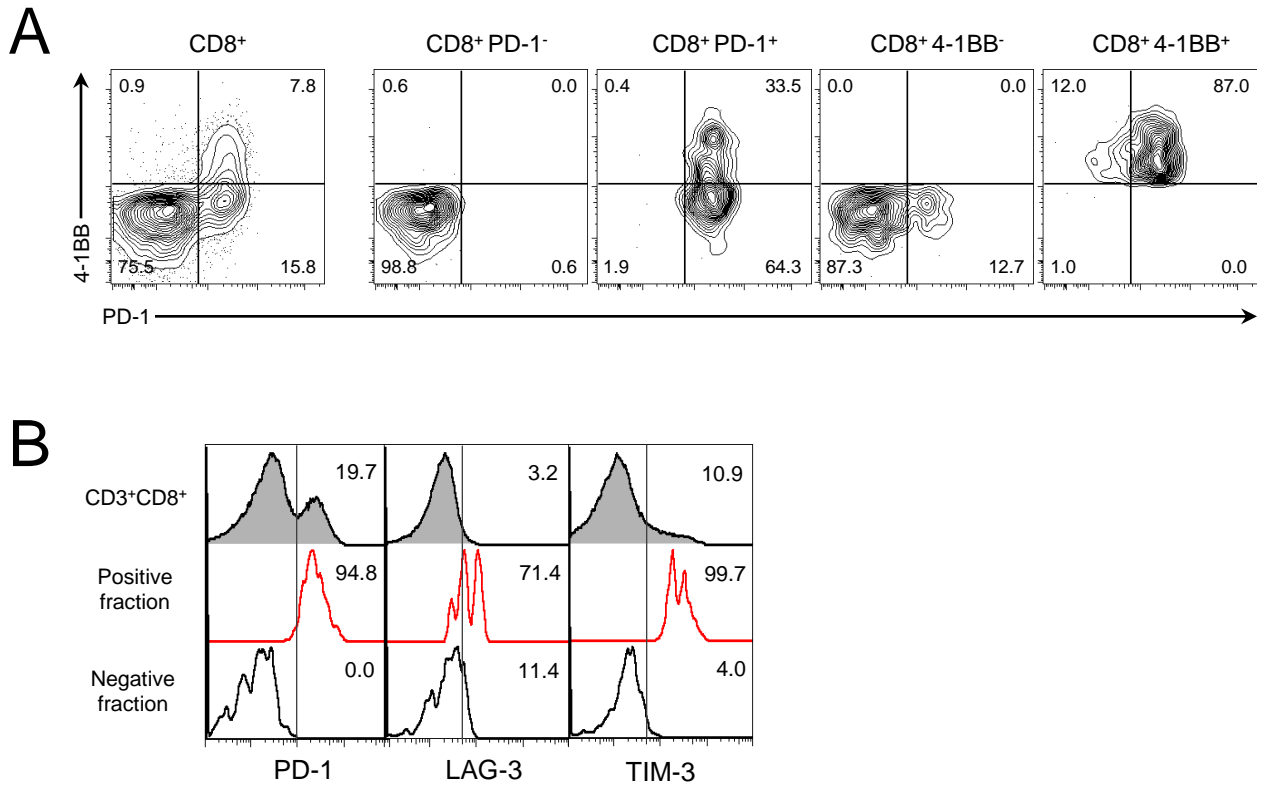

## Supplementary Figure 6. Post-sort purity of cell subsets sorted from fresh melanoma tumors.

(A) Representative dot plots of CD3<sup>+</sup>CD8<sup>+</sup> TIL sorted from FrTu1913 according to PD-1 and 4-1BB expression used for TCR $\beta$  sequencing. The post-sort purity of each of the populations sorted (bulk CD8<sup>+</sup>TIL, CD8<sup>+</sup>PD-1<sup>+</sup>, CD8<sup>+</sup>PD-1<sup>-</sup>, CD8<sup>+</sup>4-1BB<sup>+</sup> and CD8<sup>+</sup>4-1BB<sup>-</sup>) is shown. (B) Representative histograms of FrTu1913 CD3<sup>+</sup>CD8<sup>+</sup> T cells sorted based on expression of PD-1, LAG-3, and TIM-3 expression. The name of the marker used for separation of the cells is specified below each histogram. The frequency of expression of each of the markers in the unsorted CD8<sup>+</sup> population and the post-sorted samples (positive fraction, and negative fraction) are shown.

Supplementary Table 1. Recognition of autologous and allogeneic tumor cell lines by TIL derived from fresh tumor FrTu1913

|              |                    | No target | TC1913<br>Aut. <sup>a</sup> | TC1913<br>HLA-I block <sup>b</sup> | FrTu#1913<br>Aut. | FrTu#1913<br>HLA-I block | TC624 CIITA<br>Allo. <sup>c</sup><br>A*0201 <sup>d</sup> | TC624 CIITA<br>HLA-I block | TC624 CIITA<br>HLA-II block <sup>b</sup> | TC2119<br>Allo.<br>A*0201 | TC2448<br>Allo.<br>A*0201 | TC1865<br>Allo.<br>A*0201 | TC1379<br>Allo.<br>A*1101 <sup>d</sup> | TC2301<br>Allo. | OKT3 <sup>e</sup><br>(0.1 µg/ml) |
|--------------|--------------------|-----------|-----------------------------|------------------------------------|-------------------|--------------------------|----------------------------------------------------------|----------------------------|------------------------------------------|---------------------------|---------------------------|---------------------------|----------------------------------------|-----------------|----------------------------------|
| TIL FrTu1913 | CD8+               | 31 (0.7)  | 77 (0.8)                    | 0 (0.8)                            | 398 (1.1)         | 83 (0.6)                 | 14598 (2.2)                                              | 40 (0.8)                   | 9626 (2.1)                               | 2127 (0.7)                | 1845 (1.5)                | 318 (2.3)                 | 1760 (2.0)                             | 606 (1.1)       | 84824 (91.1)                     |
|              | PD-1 <sup>-</sup>  | 0 (0.1)   | 0 (0.4)                     | 0 (0.2)                            | 27 (0.5)          | 13 (0.2)                 | 11103 (2.9)                                              | 0 (0.5)                    | 9986 (1.6)                               | 78 (0.2)                  | 105 (0.7)                 | 1456 (3.0)                | 424 (1.9)                              | 355 (1.2)       | 79037 (91.9)                     |
|              | PD-1+              | 11 (0.4)  | 26696 (42.2)                | 851 (16.9)                         | 4108 (45.0)       | 363 (4.4)                | 0 (0.2)                                                  | 0 (0.3)                    | 0 (0.5)                                  | 1766 (1.6)                | 0 (0.8)                   | 0 (0.3)                   | 0 (0.3)                                | 266 (2.1)       | 45319 (92.2)                     |
|              | LAG-3 <sup>-</sup> | 4 (0.4)   | 53 (n.d.)                   | 0 (0.5)                            | 225 (1.1)         | 45 (0.4)                 | 17820 (3.7)                                              | 20 (0.9)                   | 14872 (2.9)                              | 532 (0.7)                 | 91 (0.6)                  | 922 (4.8)                 | 808 (3.9)                              | 571 (1.7)       | 78940 (91.6)                     |
|              | LAG-3+             | 0 (0.1)   | 55291 (49.0)                | 2345 (25.3)                        | 6485 (45.7)       | 449 (4.3)                | 0 (0.1)                                                  | 0 (0.1)                    | 0 (0.1)                                  | 412 (0.8)                 | 0 (0.1)                   | 0 (0.3)                   | 0 (0.2)                                | 0 (0.1)         | 86689 (92.9)                     |
|              | TIM-3 <sup>-</sup> | 0 (0.1)   | 11 (0.6)                    | 0 (0.1)                            | 136 (0.6)         | 41 (0.2)                 | 8092 (2.5)                                               | 0 (0.3)                    | 6316 (1.6)                               | 1614 (0.2)                | 467 (0.9)                 | 1050 (4.1)                | 1167 (4.5)                             | 160 (1.3)       | >1666 (91.1)                     |
|              | TIM-3+             | 0 (0.1)   | 25472 (53.4)                | 1000 (17.9)                        | 4761 (60.0)       | 310 (5.4)                | 0 (0.1)                                                  | 0 (0.1)                    | 0 (0.1)                                  | 3545 (2.0)                | 7 (1.6)                   | 0 (0.1)                   | 0 (0.1)                                | 500 (1.5)       | 53519 (96.2)                     |
| Controls     | F5 Td              | 24 (0.9)  | 47 (0.6)                    | 43 (0.2)                           | 148 (1.6)         | 96 (0.6)                 | 22492 (59.0)                                             | 551 (14.1)                 | 27567 (57.0)                             | 33 (0.4)                  | 13020 (58.1)              | 1056 (12.7)               | 15 (0.4)                               | 21 (0.6)        | 81066 (98.4)                     |
|              | CD4 T4             | 12 (0)    | 24 (0.4)                    | 17 (0.3)                           | 90 (0.3)          | 65 (0.3)                 | 18831 (21.7)                                             | 20301 (20.0)               | 6305 (8.7)                               | 0 (0)                     | 0 (0)                     | 3440 (8.0)                | 0 (0.1)                                | 30 (0)          | 17949 (29.6)                     |
|              | AK TIL1700         | 124 (1.1) | 26 (1.4)                    | 0 (0.6)                            | 83 (1.1)          | 58 (0.5)                 | 85 (2.1)                                                 | 11 (0.5)                   | 95 (2.0)                                 | 37 (1.3)                  | 195 (4.2)                 | 249 (2.2)                 | 30 (0.9)                               | 0 (0.6)         | 21976 (82.9)                     |

Recognition of melanoma cell lines was assessed by evaluating IFN-γ release and upregulation of 4-1BB 24h after the coculture. Values represent the average pg/ml of IFN-γ released (duplicates). Percentage of CD3+ CD8+ 4-1BB+ cells for each condition is shown in parenthesis. For CD4 T4, the values in parenthesis represent the CD3+CD8-4-1BB+ cells. Control effectors: PBMC transduced with a T cell receptor recognizing Mart-1<sub>26-35</sub> epitope (F5 Td); PBMC transduced with a Tyrosinase<sub>450-462</sub> specific HLA-DR4-restricted T-cell receptor (CD4 T4). TC624 CIITA cell line is HLA-A\*0201+ and HLA-DR4+ and expresses both MART1 and Tyrosinase. AK TIL1700 was used as a negative control.

<sup>a</sup> Autologous tumor cell line

<sup>b</sup> HLA-I block/HLA-II block denote the addition of HLA-I (W6/32) or HLA-II (IVA12) blocking antibodies during the coculture

<sup>c</sup> Allogeneic tumor cell line

<sup>d</sup> Cell line matched for the particular allele specified with tumor cell line TC1913

<sup>e</sup>Plate-bound anti-CD3 stimulation

**Supplementary Table 2. Recognition of autologous and allogeneic tumor cell lines by TIL derived from tumor FrTu3289**

|          | No target          | TC3289<br>Aut. <sup>a</sup> | TC3289<br>HLA-I block <sup>b</sup> | TC1379<br>Allo. <sup>c</sup> | TC526<br>Allo. | TC526<br>HLA-I block | CD4 <sup>+</sup> CD25 <sup>-</sup><br>Aut. normal <sup>d</sup> | OKT3 <sup>e</sup><br>(0.1 µg/ml) |
|----------|--------------------|-----------------------------|------------------------------------|------------------------------|----------------|----------------------|----------------------------------------------------------------|----------------------------------|
| TIL 3289 | CD8 <sup>+</sup>   | 0 (0.4)                     | 273 (4.5)                          | 0 (0.4)                      | 0 (0.6)        | 141 (1.6)            | 0 (0.2)                                                        | 34289 (87.7)                     |
|          | PD-1 <sup>-</sup>  | 5 (0.2)                     | 6 (0.8)                            | 0 (0.1)                      | 752 (3.0)      | 117 (0.9)            | 0 (0.1)                                                        | 45225 (86.9)                     |
|          | PD-1 <sup>+</sup>  | 5 (0.3)                     | 588 (16.2)                         | 0 (0.3)                      | 0 (4.5)        | 954 (5.8)            | 0 (0.1)                                                        | 14491 (77.7)                     |
|          | LAG-3 <sup>-</sup> | 11 (0.3)                    | 54 (2.8)                           | 0 (0.2)                      | 0 (0.6)        | 0 (0.6)              | 0 (0.2)                                                        | 43907 (86.9)                     |
|          | LAG-3 <sup>+</sup> | 0 (0.6)                     | 1040 (17.9)                        | 0 (0.4)                      | 0 (2.0)        | 229 (3.2)            | 0 (0.3)                                                        | 27939 (83.4)                     |
|          | TIM-3 <sup>-</sup> | 0 (0.2)                     | 0 (0.6)                            | 0 (0.1)                      | 26 (0.4)       | 0 (0.6)              | 0 (0.2)                                                        | 49664 (85.5)                     |
|          | TIM-3 <sup>+</sup> | 0 (0.5)                     | 1116 (17)                          | 0 (0.4)                      | 0 (1.1)        | 167 (2.1)            | 0 (0.2)                                                        | 81743 (88.1)                     |
| Controls | F5 Td              | 0 (0.5)                     | 8597 (18.4)                        | 0 (0.2)                      | 0 (0.4)        | 21684 (69.1)         | 739 (12.2)                                                     | 165 (3.9)                        |
|          | AK TIL1700         | 246 (1.3)                   | 30 (0.8)                           | 12 (0.7)                     | 33 (0.8)       | 117 (1.1)            | 3 (0.5)                                                        | 231 (2.8)                        |

Recognition of melanoma cell lines was assessed by evaluating IFN- $\gamma$  release and upregulation of 4-1BB 24 h after the coculture. Values represent the average pg/ml of IFN- $\gamma$  released (duplicates). Percentage of CD3<sup>+</sup>CD8<sup>+</sup>4-1BB<sup>+</sup> cells for each condition is shown in parenthesis. Control effectors: PBMC transduced with a T cell receptor recognizing Mart-1<sub>26-35</sub> epitope (F5 Td); AK TIL1700 was used as a negative control. TC526 cell line is HLA-A\*0201+ and expresses MART1.

<sup>a</sup> Autologous tumor cell line

<sup>b</sup> HLA-I block denotes the addition of HLA-I blocking (W6/32) antibody during the coculture

<sup>c</sup> Allogeneic tumor cell line

<sup>d</sup> Autologous CD4<sup>+</sup> CD25<sup>-</sup> cells were used as normal target cells

<sup>e</sup> Plate bound anti-CD3 stimulation

**Supplementary Table 3. Recognition of autologous and allogeneic tumor cell lines by TIL derived from tumor FrTu3713**

|              |                    | No target | TC3713<br>Aut. <sup>a</sup> | TC3713<br>HLA-I block <sup>b</sup> | TC624 CIITA<br>Allo. <sup>c</sup><br>A*0201 <sup>d</sup> | TC624 CIITA<br>HLA-I block | TC624 CIITA<br>HLA-II block <sup>b</sup> | TC2119<br>Allo.<br>A*0201 | TC2119<br>HLA-I block | TC1379<br>Allo.<br>A*0201 | TC3460<br>Allo.<br>A*0201 | OKT3 <sup>e</sup><br>(0.1μ/ml) |
|--------------|--------------------|-----------|-----------------------------|------------------------------------|----------------------------------------------------------|----------------------------|------------------------------------------|---------------------------|-----------------------|---------------------------|---------------------------|--------------------------------|
| TIL FrTu3713 | CD8+               | 23 (0.1)  | 3242 (5.4)                  | 78 (2.8)                           | 731 (0.8)                                                | 38 (0.1)                   | 504 (0.4)                                | 174 (0.6)                 | 17 (0.1)              | 66 (0.4)                  | 34 (0.1)                  | 43093 (52.0)                   |
|              | PD-1 <sup>-</sup>  | 20 (0.1)  | 91 (0.6)                    | 8 (0.1)                            | 618 (0.6)                                                | 35 (0.1)                   | 695 (0.3)                                | 390 (0.4)                 | 20 (0.1)              | 92 (0.6)                  | 63 (0.2)                  | 56023 (66.0)                   |
|              | PD-1 <sup>+</sup>  | 0 (0.3)   | 7787 (51.0)                 | 405 (24.1)                         | 27 (0.8)                                                 | 64 (0.3)                   | 0 (0.3)                                  | 0 (0.8)                   | 0 (0.2)               | 0 (0.5)                   | 0 (0.7)                   | 17037 (61.2)                   |
|              | TIM-3 <sup>-</sup> | 9 (0.2)   | 457 (1.4)                   | 38 (0.4)                           | 247 (1.3)                                                | 76 (0.5)                   | 215 (0.6)                                | 140 (0.6)                 | 12 (0)                | 153 (0.7)                 | 40 (0.3)                  | 57436 (58.8)                   |
|              | TIM-3 <sup>+</sup> | 0 (0.2)   | 9650 (54.1)                 | 342 (19.2)                         | 38 (0.9)                                                 | 0 (0.3)                    | 0 (0.4)                                  | 11 (0.5)                  | 0 (0.2)               | 0 (0.7)                   | 0 (0.6)                   | 13933 (53.8)                   |
| Controls     | F5 Td              | 39 (0.6)  | 65 (0.4)                    | 31 (0.2)                           | 2445 (19.2)                                              | 232 (0.6)                  | 3978 (20.6)                              | 112 (0.7)                 | 68 (0.2)              | 30 (0.4)                  | 2455 (0.6)                | 61253 (90.9)                   |
|              | CD4 T4             | 0 (0.1)   | 0 (0.5)                     | 0 (0.2)                            | 3091 (11.6)                                              | 3436 (4.6)                 | 182 (2.0)                                | 8 (1.1)                   | 0 (0.3)               | 0 (0.6)                   | 38 (1.8)                  | 4150 (33.6)                    |
|              | AK TIL1700         | 9 (1.3)   | 15 (7.5)                    | 0 (1.0)                            | 38 (3.7)                                                 | 7 (1.1)                    | 77 (3.2)                                 | 23 (3.5)                  | 18 (1.6)              | 0 (1.7)                   | 46 (2.0)                  | 2198 (78.1)                    |

Recognition of melanoma cell lines was assessed by evaluating IFN- $\gamma$  release and upregulation of 4-1BB 24 h after the coculture. Values represent the average pg/ml of IFN- $\gamma$  released (duplicates). Percentage of CD3<sup>+</sup> CD8<sup>+</sup> 4-1BB<sup>+</sup> cells for each condition is shown in parenthesis. For CD4 T4, the values in parenthesis represent the CD3<sup>+</sup>CD8-4-1BB<sup>+</sup> cells evaluated 24h after coculture. Control effectors: PBMC transduced with a T cell receptor recognizing Mart-1<sub>26-35</sub> epitope (F5 Td); PBMC transduced with a Tyrosinase<sub>450-462</sub> specific HLA-DR4-restricted T-cell receptor (CD4 T4). TC624 CIITA is HLA-A\*0201+ and HLA-DR4+ and expresses both MART1 and Tyrosinase; AK TIL1700 was used as a negative control.

<sup>a</sup> Autologous tumor cell line

<sup>b</sup> HLA-I block/HLA-II block denote the addition of HLA-I (W6/32) or HLA-II (IVA12) blocking antibodies during the coculture

<sup>c</sup> Allogeneic tumor cell line

<sup>d</sup> Cell line matched for the particular allele specified with tumor cell line TC3713

<sup>e</sup> Plate bound anti-CD3 stimulation

**Supplementary Table 4. Recognition of autologous tumor and allogeneic tumor cell lines by TIL derived from tumor FrTu3550**

|              |                    | % CD3 <sup>+</sup> CD8 <sup>+</sup><br>Post- REP <sup>a</sup> | No target | TC3550<br>Aut. <sup>b</sup> | TC3550<br>HLA-I block <sup>c</sup> | TC624<br>Allo. <sup>d</sup> | TC624<br>HLA-I block | TC3460<br>Allo. | TC3460<br>HLA-I block | OKT3 <sup>e</sup><br>(0.1µg/ml) |
|--------------|--------------------|---------------------------------------------------------------|-----------|-----------------------------|------------------------------------|-----------------------------|----------------------|-----------------|-----------------------|---------------------------------|
| TIL FrTu3550 | CD3 <sup>+</sup>   | 70                                                            | 10 (0.4)  | 55 (8.1)                    | 11 (0.1)                           | 321 (5.9)                   | 12 (0.1)             | 11 (0.1)        | 12 (0.1)              | 136493 (94.9)                   |
|              | PD-1 <sup>-</sup>  | 38                                                            | 18 (0.4)  | 20 (1.7)                    | 12 (0.1)                           | 50 (2.9)                    | 21 (0.2)             | 95 (0.8)        | 76 (0.3)              | 63949 (79.4)                    |
|              | PD-1 <sup>+</sup>  | 45                                                            | 10 (0.6)  | 1178 (27.3)                 | 15 (1.3)                           | 86 (4.7)                    | 13 (0.3)             | 39 (0.7)        | 25 (0.2)              | 39044 (91.5)                    |
|              | LAG-3 <sup>-</sup> | 52                                                            | 13 (0.1)  | 16 (0.3)                    | 17 (0)                             | 38 (0.5)                    | 23 (0.1)             | 128 (0.2)       | 99 (0.1)              | 42645 (75.2)                    |
|              | LAG-3 <sup>+</sup> | 97                                                            | 13 (0.2)  | 1256 (19.5)                 | 13 (0.3)                           | 136 (6.2)                   | 12 (0.1)             | 11 (0.1)        | 11 (0.1)              | 22468 (75.5)                    |
|              | TIM-3 <sup>-</sup> | 52                                                            | 16 (0.2)  | 15 (0.3)                    | 13 (0)                             | 31 (0.4)                    | 19 (0.1)             | 456 (0.4)       | 355 (0.1)             | 46018 (72.0)                    |
|              | TIM-3 <sup>+</sup> | 99                                                            | 11 (0.2)  | 1502 (18.4)                 | 12 (0.1)                           | 101 (7.4)                   | 15 (0.1)             | 13 (0.1)        | 12 (0)                | 39419 (87.4)                    |
| Controls     | AK TIL1700         | 82                                                            | 10 (3.6)  | 0 (1.0)                     | 0 (2.9)                            | 23 (1.1)                    | 0 (1.1)              | 0 (0.6)         | 0 (0.2)               | 21539 (90.1)                    |
|              | F5 Td              | 97                                                            | 0 (0.2)   | 0 (0.2)                     | 0 (0.1)                            | 9016 (53.8)                 | 97 (14.7)            | 0 (0.4)         | 0 (0.1)               | 77948 (83.2)                    |

Recognition of melanoma cell lines was assessed by evaluating IFN- $\gamma$  release and upregulation of 4-1BB 24h after the coculture. Values represent the average pg/ml of IFN- $\gamma$  released (duplicates). Percentage of CD3<sup>+</sup>CD8<sup>+</sup>4-1BB<sup>+</sup> cells for each condition is shown in parenthesis. Control effectors: PBMC transduced with a T cell receptor recognizing Mart-1<sub>26-35</sub> epitope (F5 Td); AK TIL1700 was used as a negative control. TC624 cell line is HLA-A\*0201+ and expresses MART1.

<sup>a</sup> Cells were originally sorted from the fresh tumor gating on CD3<sup>+</sup>, and the percentage of CD3<sup>+</sup> CD8<sup>+</sup> after expansion (Post-REP) is shown.

<sup>b</sup> Autologous tumor cell line

<sup>c</sup> HLA-I block denotes the addition of HLA-I (W6/32) blocking antibody during the coculture

<sup>d</sup> Allogeneic tumor cell line

<sup>e</sup> Plate bound anti-CD3 stimulation

**Supplementary Table 5. Recognition of autologous tumor and allogeneic tumor cell lines by TIL derived from FrTu2448**

|                      | No target | TC2448<br>Aut. <sup>a</sup> | TC2448<br>HLA-I block <sup>b</sup> | TC2301<br>Allo. <sup>c</sup> | TC526<br>Allo.<br>A*0201 <sup>d</sup> | TC526<br>HLA-I block | CD4 <sup>+</sup> CD25 <sup>-</sup><br>Aut. normal <sup>e</sup> | OKT3 <sup>f</sup><br>(0.1 µg/ml) |
|----------------------|-----------|-----------------------------|------------------------------------|------------------------------|---------------------------------------|----------------------|----------------------------------------------------------------|----------------------------------|
| <b>TIL FrTu 2448</b> |           |                             |                                    |                              |                                       |                      |                                                                |                                  |
| CD8 <sup>+</sup>     | 0 (1.4)   | 0 (1.7)                     | 0 (0.5)                            | 0 (1.1)                      | 205 (2.5)                             | 0 (0.5)              | 60 (1.4)                                                       | 43195 (92.2)                     |
| PD-1 <sup>-</sup>    | 0 (0.3)   | 13 (1.8)                    | 0 (0.2)                            | 0 (0.5)                      | 1252 (14.9)                           | 9 (0.1)              | 3 (0.7)                                                        | 35718 (75.7)                     |
| PD-1 <sup>+</sup>    | 0 (1.2)   | 194 (14.5)                  | 0 (0.4)                            | 0 (1.1)                      | 1807 (15.2)                           | 0 (0.5)              | 0 (1.9)                                                        | 19927 (95.4)                     |
| LAG-3 <sup>-</sup>   | 0 (1.2)   | 0 (1.6)                     | 79 (0.5)                           | 22 (0.6)                     | 15 (4.6)                              | 0 (0.4)              | 34 (1.1)                                                       | 28962 (68.8)                     |
| LAG-3 <sup>+</sup>   | 11 (0.2)  | 0 (3.3)                     | 0 (0.1)                            | 0 (0.2)                      | 82 (10.4)                             | 0 (0.2)              | 0 (0.7)                                                        | 65167 (97.1)                     |
| TIM-3 <sup>-</sup>   | 38 (0.3)  | 0 (0.9)                     | 0 (0.3)                            | 83 (0.8)                     | 69 (1.5)                              | 0 (0.3)              | 245 (0.9)                                                      | 76231 (94.7)                     |
| TIM-3 <sup>+</sup>   | 0 (0.4)   | 543 (9.9)                   | 0 (0.4)                            | 0 (0.4)                      | 2862 (9.7)                            | 7 (0.4)              | 54 (2.0)                                                       | 50990 (95.7)                     |
| <b>F5 Td</b>         | 56 (0.6)  | 4101 (40.1)                 | 175 (3.0)                          | 70 (0.6)                     | 18497 (73.3)                          | 1373 (13.8)          | 242 (90.8)                                                     | 62741 (91.6)                     |
| <b>AK TIL1700</b>    | 344 (0.8) | 386 (4.2)                   | 75 (1.0)                           | 120 (1.1)                    | 317 (1.9)                             | 120 (0.8)            | 266 (1.2)                                                      | 27753 (86.8)                     |

Recognition of melanoma cell lines was assessed by evaluating IFN- $\gamma$  release and upregulation of 4-1BB 24 h after the coculture. Values represent the average pg/ml of IFN- $\gamma$  released (duplicates). Percentage of CD3<sup>+</sup>CD8<sup>+</sup>4-1BB<sup>+</sup> cells for each condition is shown in parenthesis. Control effectors: PBMC transduced with a T cell receptor recognizing Mart-1<sub>26-35</sub> epitope (F5 Td); AK TIL1700 was used as a negative control.

<sup>a</sup> Autologous tumor cell line.

<sup>b</sup> MHC I block denotes the addition of HLA-I (W6/32) blocking antibody during the coculture

<sup>c</sup> Allogeneic tumor cell line

<sup>d</sup> Cell line matched for the particular allele specified with tumor cell line TC2448

<sup>e</sup> Autologous CD4<sup>+</sup> CD25<sup>-</sup> cells were used as normal target cells

<sup>f</sup> Plate bound anti-CD3 stimulation

**Supplementary Table 6. Recognition of autologous tumor and allogeneic tumor cell lines by TIL derived from FrTu3289**

|                                      | No target |       | TC3289<br>Aut. <sup>a</sup> |        | TC3289 |       | TC624 CIITA<br>Allo. <sup>c</sup> |        | TC1913<br>Allo. |        | OKT3 <sup>d</sup><br>0.1 µg/ml |        | TC624 CIITA<br>HLA-I block |        | TC624 CIITA<br>HLA-II block <sup>b</sup> |        |
|--------------------------------------|-----------|-------|-----------------------------|--------|--------|-------|-----------------------------------|--------|-----------------|--------|--------------------------------|--------|----------------------------|--------|------------------------------------------|--------|
|                                      |           |       |                             |        |        |       |                                   |        |                 |        |                                |        |                            |        |                                          |        |
| CD8 <sup>+</sup>                     | 18        | (0.3) | 107                         | (3.9)  | 24     | (0.4) | 81                                | (3.6)  | 27              | (1.1)  | 32587                          | (91.9) |                            |        |                                          |        |
| PD-1 <sup>-</sup>                    | 29        | (1.0) | 75                          | (4.8)  | 21     | (1.5) | 103                               | (4.4)  | 25              | (2.7)  | 65554                          | (89.8) |                            |        |                                          |        |
| PD-1 <sup>+</sup>                    | 13        | (2.5) | 2127                        | (31.7) | 9      | (2.2) | 72                                | (6.5)  | 8               | (4.1)  | 16910                          | (90.1) |                            |        |                                          |        |
| TIM-3 <sup>-</sup>                   | 47        | (0.2) | 35                          | (1.3)  | 18     | (0.3) | 71                                | (2.8)  | 20              | (0.7)  | 55642                          | (87.2) |                            |        |                                          |        |
| TIM-3 <sup>+</sup>                   | 16        | (1.2) | 2361                        | (33.7) | 30     | (1.0) | 123                               | (5.9)  | 19              | (2.6)  | 18020                          | (95.1) |                            |        |                                          |        |
| LAG-3 <sup>-</sup>                   | 23        | (0.3) | 20                          | (1.3)  | 17     | (0.4) | 126                               | (2.9)  | 32              | (1.1)  | 55437                          | (87.5) |                            |        |                                          |        |
| LAG-3 <sup>+</sup>                   | 6         | (1.9) | 2357                        | (34.2) | 6      | (2.1) | 732                               | (13.8) | 8               | (3.7)  | 18206                          | (91.8) |                            |        |                                          |        |
| PD-1 <sup>-</sup> TIM-3 <sup>-</sup> | 25        | (0.6) | 19                          | (2.4)  | 22     | (0.8) | 146                               | (4.3)  | 55              | (2.0)  | 46080                          | (89.0) |                            |        |                                          |        |
| PD-1 <sup>-</sup> TIM-3 <sup>+</sup> | 32        | (1.2) | 3411                        | (22.3) | 33     | (1.3) | 732                               | (7.3)  | 63              | (4.0)  | 50553                          | (88.8) |                            |        |                                          |        |
| PD-1 <sup>+</sup> TIM-3 <sup>-</sup> | 24        | (3.3) | 2770                        | (45.2) | 20     | (3.9) | 1175                              | (18.8) | 16              | (6.4)  | 34950                          | (82.9) |                            |        |                                          |        |
| PD-1 <sup>+</sup> TIM-3 <sup>+</sup> | 30        | (1.5) | 215                         | (16.1) | 16     | (1.8) | 488                               | (12.8) | 18              | (4.1)  | 17694                          | (75.0) |                            |        |                                          |        |
| PD-1 <sup>-</sup> LAG-3 <sup>-</sup> | 38        | (0.7) | 29                          | (2.1)  | 19     | (0.7) | 106                               | (5.3)  | 33              | (1.6)  | 21707                          | (90.3) |                            |        |                                          |        |
| PD-1 <sup>-</sup> LAG-3 <sup>+</sup> | 24        | (1.3) | 438                         | (20.6) | 22     | (1.2) | 62                                | (5.0)  | 19              | (2.2)  | 20877                          | (92.6) |                            |        |                                          |        |
| PD-1 <sup>+</sup> LAG-3 <sup>-</sup> | 16        | (3.9) | 2409                        | (42.4) | 12     | (5.8) | 277                               | (14.6) | 20              | (8.5)  | 26653                          | (94.6) |                            |        |                                          |        |
| PD-1 <sup>+</sup> LAG-3 <sup>+</sup> | 11        | (1.8) | 286                         | (13.3) | 12     | (3.1) | 846                               | (11.2) | 17              | (3.6)  | 55811                          | (89.8) |                            |        |                                          |        |
| TIL1913                              | 11        | (0.3) | 41                          | (2.7)  | 13     | (0.4) | 8                                 | (0.9)  | 10017           | (59.4) |                                |        |                            |        |                                          |        |
| CD4 T4                               | 0         | (0.1) |                             |        |        |       | >16666                            | (34.4) | 0               | 0.3    | 13815                          | (45.1) | >16666                     | (31.0) | 195                                      | (1.7)  |
| F5 Td                                | 6         | (4.8) |                             |        |        |       | 4088                              | (21.4) | 0               | 5.2    | 13283                          | (93.8) | 36                         | (8.4)  | 3236                                     | (18.2) |

CD8<sup>+</sup> TIL populations were sorted from FrTu3289 according to PD1, LAG-3 and TIM-3 expression and expanded in vitro for 15 days. Recognition of melanoma cell lines was assessed by evaluating IFN- $\gamma$  release and upregulation of 4-1BB 24 h after the coculture. Values represent the average pg/ml of IFN- $\gamma$  released (duplicates). Percentage of CD3<sup>+</sup>CD8<sup>+</sup>4-1BB<sup>+</sup> cells for each condition is shown in parenthesis (duplicates). For CD4 T4, the values in parenthesis represent the CD3<sup>+</sup>CD8<sup>+</sup>4-1BB<sup>+</sup> cells. Control effectors: TIL grown derived from FrTu1913 (TIL1913); PBMC transduced with a T-cell receptor recognizing MART1<sub>26-35</sub> epitope (F5 Td); PBMC transduced with a Tyrosinase<sub>450-462</sub> specific HLA-DR4-restricted T-cell receptor (CD4 T4). TC624 CIITA is HLA-A\*0201+ and HLA-DR4+ and expresses both MART1 and Tyrosinase.

<sup>a</sup> Autologous tumor cell line

<sup>b</sup> HLA-I block/HLA-II block denote the addition of HLA-I (W6/32) or HLA-II (IVA12) blocking antibodies during the coculture

<sup>c</sup> Allogeneic tumor cell line

<sup>d</sup> Plate-bound anti-CD3 stimulation

**Supplementary Table 7. Patient characteristics**

| variable/trait         | Total (%) |
|------------------------|-----------|
| Total no. patients     | 24 (100)  |
| <b>Sex</b>             |           |
| Male                   | 19 (79)   |
| Female                 | 5 (21)    |
| <b>Age</b>             |           |
| 11-20                  | 2 (8)     |
| 21-30                  | 2 (8)     |
| 31-40                  | 5 (21)    |
| 41-50                  | 4 (17)    |
| 51-60                  | 10 (42)   |
| 61-70                  | 1 (4)     |
| <b>Prior Treatment</b> |           |
| Surgery                | 22 (92)   |
| Chemotherapy           | 3 (13)    |
| Radiotherapy           | 2 (8)     |
| Immunotherapy          | 19 (79)   |
| Any 2 or more          | 17 (71)   |
| Any 3 or more          | 4 (17)    |
| No treatment           | 2 (8)     |

**Supplementary Table 8. Immunotherapeutic regimens prior to tumor resection**

| Tumor sample | Prior Immunotherapy                                                       | Months prior to resection | Site of tumor resection |
|--------------|---------------------------------------------------------------------------|---------------------------|-------------------------|
| FrTu1913     | Cisplatin, vinblastine, dacarbazine, IL-2 <sup>a</sup> , IFN <sup>b</sup> | 8                         | Subcutaneous            |
|              | MART-1: 26-35(27L)/gp100: 209-2017 (210M)+IL-2 <sup>c</sup>               | 2                         |                         |
| FrTu3289     | Cisplatin, vinblastine, dacarbazine, IL-2                                 | 54                        | Spleen                  |
| FrTu3612     | IL-2                                                                      | 4                         | Mesenteric/small bowel  |
| FrTu3713     | IL-2                                                                      | 6                         | Lung                    |
|              | anti-CTLA-4 <sup>d</sup>                                                  | 2                         |                         |
| FrTu3550     | -                                                                         |                           | Axillary LN             |
| FrTu2448     | IL-7 <sup>e</sup>                                                         | 2                         | Inguinal LN             |

<sup>a</sup> Interleukin 2

<sup>b</sup> Interferon

<sup>c</sup> Immunization by subcutaneous injection of the peptides specified emulsified in incomplete Freund's adjuvant and IL-2

<sup>d</sup> Anti-cytotoxic T-lymphocyte antigen 4 blocking antibody

<sup>e</sup> Interleukin 7

**Supplementary Table 9. Fold-expansion of TIL sorted and expanded from fresh tumor digests.**

|                       | Fold expansion   |                   |                   |                    |                    |                    |                    |                                       |                                       |                                       |
|-----------------------|------------------|-------------------|-------------------|--------------------|--------------------|--------------------|--------------------|---------------------------------------|---------------------------------------|---------------------------------------|
|                       | CD8 <sup>+</sup> | PD-1 <sup>-</sup> | PD-1 <sup>+</sup> | LAG-3 <sup>-</sup> | LAG-3 <sup>+</sup> | TIM-3 <sup>-</sup> | TIM-3 <sup>+</sup> | PD-1 <sup>+</sup> /4-1BB <sup>-</sup> | PD-1 <sup>+</sup> /4-1BB <sup>+</sup> | PD-1 <sup>+</sup> /4-1BB <sup>+</sup> |
| FrTu1913              | 3200             | 4400              | 4400              | 4400               | 73807              | 4583               | 7000               |                                       |                                       |                                       |
| FrTu2448              | 5078             | 2916              | 44332             | 2156               | 127871             | 2105               | 68966              |                                       |                                       |                                       |
| FrTu3289              | 3275             | 3650              | 4700              | 4400               | 6643               | 4200               | 5200               |                                       |                                       |                                       |
| FrTu3550 <sup>a</sup> | 643              | 311.5             | 793.6             | 277                | 828                | 285                | 1280               |                                       |                                       |                                       |
| FrTu3713              | 2867             | 3067              | 3333              |                    |                    | 5450               | 15000              | 714                                   | 1811                                  | 2080                                  |
| FrTu3612              | 1720             | 495               | 1651              |                    |                    |                    |                    |                                       |                                       |                                       |

Cells were FACS sorted to high purity from the fresh tumor digests specified and then expanded with anti-CD3 stimulation, IL-2, and irradiated feeders. Fold-expansion of the cells after 15 days in culture is shown.

<sup>a</sup> Cells from FrTu3550, were sorted based on CD3 expression, and fold-expansion corresponds to CD3<sup>+</sup> T cells
